# Supplementary material
Source: PubMed Central journal article supplement (PMC4387113)

**Suppl. Figure 2. siRNA-mediated inhibition of Malic Enzyme-1 expression increases cell death in *Hace1* wt MEFs.**

**A.**

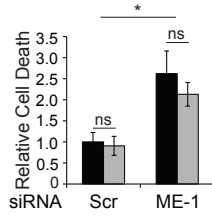

**B.**

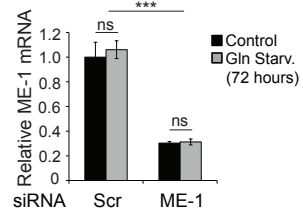

Supplement: NIHMS619139-supplement-2.pdf [file NIHMS619139-supplement-2.pdf]
