# Supplementary material
Source: PubMed Central journal article supplement (PMC4387113)

**Suppl. Figure 1. shRNA-mediated inhibition of Hace1 expression in HEK293 cells increases gln uptake.**

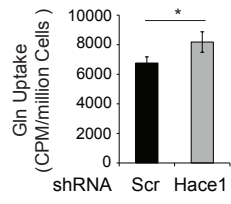

Supplement: NIHMS619139-supplement-1.pdf [file NIHMS619139-supplement-1.pdf]
